# Supplementary material for: Secondhand Smoke Exposure and Subclinical Cardiovascular Disease: The Multi‐Ethnic Study of Atherosclerosis
Source: PubMed Central journal article supplement — J Am Heart Assoc. 2016 Dec 19;5(12):e002965. doi: 10.1161/JAHA.115.002965 (PMC5210438; doi:10.1161/jaha.115.002965), 2016-12-19
Supplement: JAH3-5-e002965-s001.pdf [file JAH3-5-e002965-s001.pdf]

# **SUPPLEMENTAL MATERIAL**

**Table S1.** Sociodemographic Characteristics of 5,032 Non-Smoking MESA Participants by Smoking Status Exposure Assessment

|                  | <b>MESA non-smokers</b> | <b>Study population</b> | <b>Study population subset with urinary cotinine available</b> |
|------------------|-------------------------|-------------------------|----------------------------------------------------------------|
| <b>N</b>         | <b>5,820</b>            | <b>5,032</b>            | <b>2,982</b>                                                   |
| Men              | 45.8                    | 46.0                    | 47.3                                                           |
| Age, years       | 62.76 (10.28)           | 62.5 (10.3)             | 61.64 (9.96)                                                   |
| Race/Ethnicity   |                         |                         |                                                                |
| White            | 39.0                    | 39.5                    | 35.9                                                           |
| African-American | 26.2                    | 24.1                    | 22.5                                                           |
| Chinese-American | 12.9                    | 14.1                    | 18.8                                                           |
| Hispanic         | 22.0                    | 22.4                    | 22.8                                                           |
| Study Site       |                         |                         |                                                                |
| Winston Salem    | 15.3                    | 14.2                    | 13.5                                                           |
| New York         | 16.0                    | 16.3                    | 18.2                                                           |
| Baltimore        | 15.9                    | 14.6                    | 11.7                                                           |
| St Paul          | 15.1                    | 15.2                    | 13.3                                                           |
| Chicago          | 17.6                    | 18.4                    | 20.0                                                           |
| Los Angeles      | 20.2                    | 21.2                    | 23.4                                                           |

All values are percentages, except for age for which means (standard deviations) are reported
